# Supplementary material for: Biochemical Competition Makes Fatty-Acid β-Oxidation Vulnerable to Substrate Overload
Source: PLOS journal article supplement (doi:10.1371/journal.pcbi.1003186), 2013-08-15

**Figure S2: Comparison of the acylcarnitine concentrations between model and experiment**

**Panel A:** palmitoyl CoA as substrate. Experimental values are depicted at the x-axis and the model values at the y-axis. Experimental concentration is the total concentration of intra and extramitochondrial acyl carnitine. Error bars indicate the SEM of the experimental data (n=8). The black line represents a perfect match between the model and experimental values.

**Panel B:** palmitoylcarnitine as substrate. Experimental values are depicted at the x-axis and the model values at the y-axis. Experimental concentration is the total concentration of intra and extramitochondrial acyl carnitine. Error bars indicate the SEM of the experimental data (n=8). The black line represents a perfect match between the model and experimental values.

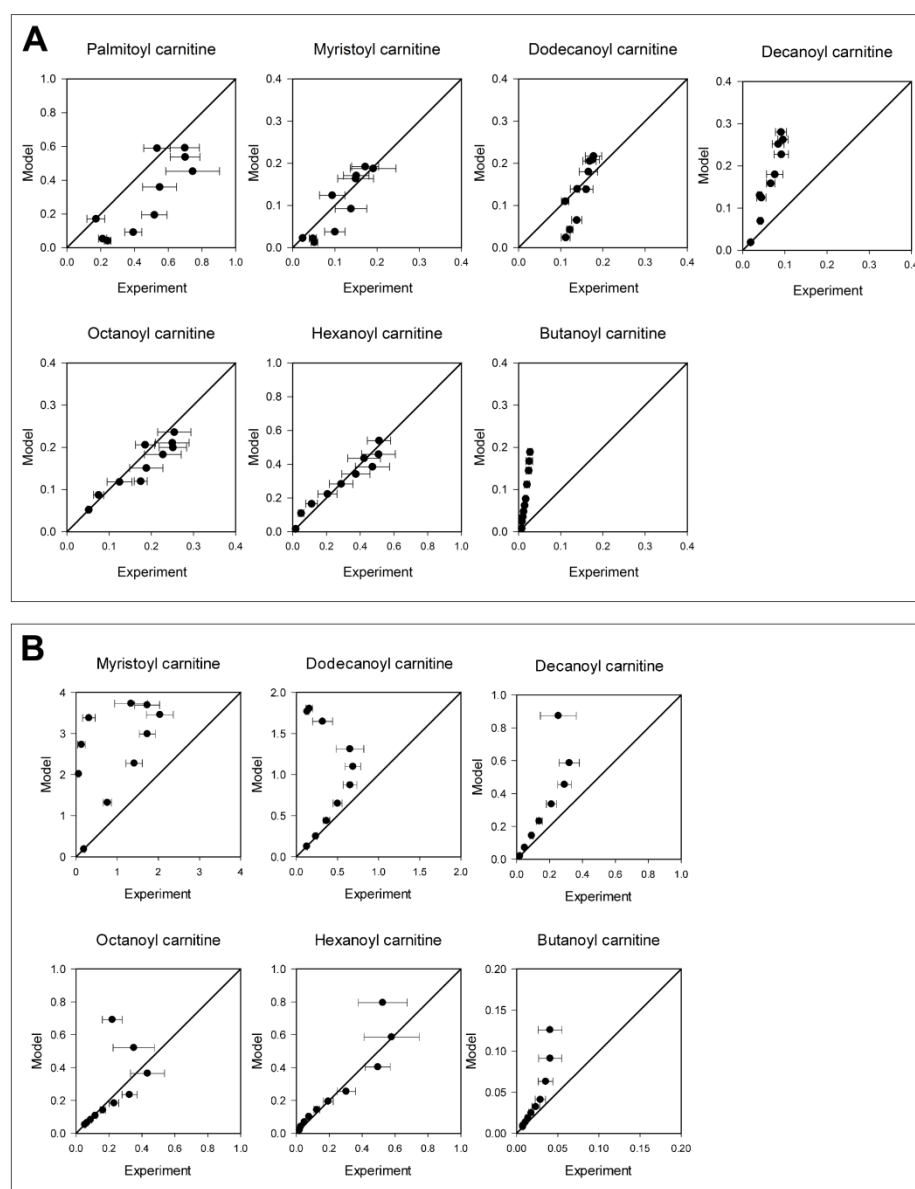

Supplement: S2 (10.1371/journal.pcbi.1003186.s002) [file journal.pcbi.1003186.s002]
